# Supplementary material for: In situ probing electronic dynamics at organic bulk heterojunction/aqueous electrolyte interfaces by charge modulation spectroscopy
Source: Royal Society of Chemistry journal article supplement (doi:10.1039/c7cp06675a), 2017-12-08
Supplement: c7cp06675a1.pdf [file c7cp06675a1.pdf]

## In-situ Probing Electronic Dynamics at Organic Bulk Heterojunction/Aqueous Electrolyte Interfaces by Charge Modulation Spectroscopy

Haihua Xu,<sup>\*,†,‡,§</sup> Ying Lv,<sup>†,‡,§</sup> Yongchun Deng,<sup>†,‡,§</sup> Qingqing Zhu<sup>†,‡,§</sup>

<sup>†</sup> School of Biomedical Engineering, Health Science Centre, Shenzhen University, Shenzhen 518060, China.

<sup>‡</sup> Guangdong Key Laboratory for Biomedical Measurements and Ultrasound Imaging, Shenzhen, China.

<sup>§</sup> National-Regional Key Technology Engineering Laboratory for Medical Ultrasound, Shenzhen, China.

### 1. Device fabrication:

A transparent quartz glass substrate was firstly ultrasonically immersed in acetone and isopropyl for 10 minutes to clean the organic impurity, and then soaked in a blend of H<sub>2</sub>SO<sub>4</sub>/H<sub>2</sub>O<sub>2</sub> (1:1) for 5 minutes, and then modified by oxygen plasma surface treatment equipment for 5 min. The Au/Cr gate and source/drain electrodes were firstly patterned together by photolithography and on a transparent quartz glass substrate and deposited by evaporation in high vacuum of 10<sup>-5</sup> mbar. The source/drain electrode was designed as an interdigital channel structure with channel width and length of 15 mm and 10 μm. The gap between the gate electrode and the source/drain electrode was ~1 mm to avoid the gate electrode from contacting with the OSC layer and ensure the aqE solution cover the source/drain channel and gate electrode. The surfaces of the electrodes were treated by 10 mM 1-octanethiol for 2 minutes in ambient air after the cleaning process to reduce the contact resistance and improve the surface morphology. And then, to construct aqEGOT and aqEGHT devices, a 40-nm-thick pOSC or OBHJ active layer was deposited on the substrate by spin-coating 5 mg/mL solution of electron donor P3HT (Sigma-Aldrich Co. LLC) or blend solution of P3HT and electron acceptor PC<sub>71</sub>BM (Sigma-Aldrich Co. LLC) (mass ratio 1:1) followed by annealing at 145 °C for 20 minutes in a glovebox. Finally, a 2-mm-thick poly(dimethylsiloxane) (PDMS, Sigma-Aldrich Co. LLC) square well with width and length of ~1 mm and ~3 mm was attached on the substrate to reserve 0.1 M NaCl aqE solution.

To carry out the CMS experiment, a semitransparent top-gate field-effect transistor with a polymer dielectric PMMA was constructed. The source-drain electrodes and active layer were defined in similar with those in aqEGOT and aqEGHT devices. Next, the A 630 nm-thick dielectric layer of PMMA spin-coated on the pOSC and OBHJ films and dried at 80 °C for 30 minutes. Finally, a semitransparent aluminum gate electrode was evaporated.

## 2. CIMS measurements:

In the CIMS experiment, the aqEGOT device is placed on a transparent floating holder. The source/drain electrodes were grounded and a variable gating voltage was applied by Keithley 2612B Sourcemeter. A wide-spectrum light emitted from a halogen lamp (Avantes AvaLight-HAL-S-MIN) was coupled to the interdigital part of the device through a fiber. Then, the transmission light through a beam splitter was collected by a UV-visible (Avantes AvaSpec-ULS 2048x64TEC) or a NIR (Ocean Optics NIRQuest256-2.5) fiber-optic spectrometer. In the TR-CIMS experiment, in case that the gating voltage is switched on, the spectra curves are immediately and automatically recorded at a time interval of one second.

## 3. Capacitance characteristics:

Capacitance characteristics of the samples are carried out by impedance spectroscopy with a Hewlett Packard 4284A LCR meter in a probe station. The source/drain electrodes were grounded and a gating voltage of a variable value and ac small signal 100 mV was applied onto the gate termination of the pOSC and OBHJ samples.

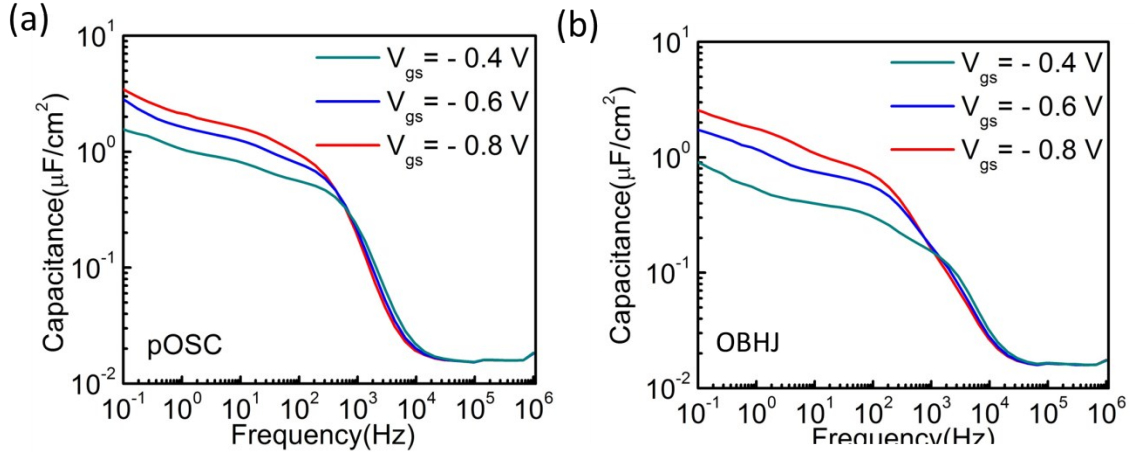

**Fig. S1** The effective capacitance versus frequency of (a) aqEGOT and (b) aqEGHT samples at  $V_{gs} = -0.4V, -0.6V$  and  $-0.8V$ .

## 4. Transistor characteristics:

Both the aqEGOT and aqEGHT device were measured by Keithley 2612B sourcemeter in a probe station in air. The hole mobility was extracted from the following equation:

$$\mu_p = \frac{2L}{W \cdot C_i} \times \left( \frac{\partial \sqrt{|I_{ds}|}}{\partial V_{gs}} \right)^2 \quad (1)$$

Where L is the channel length (L=10  $\mu\text{m}$ ), W is the channel width (W=15 mm),  $C_i$  is the capacitance of the OSC/aqE interface which were obtained from the capacitance-frequency curves at  $f=10$  Hz.

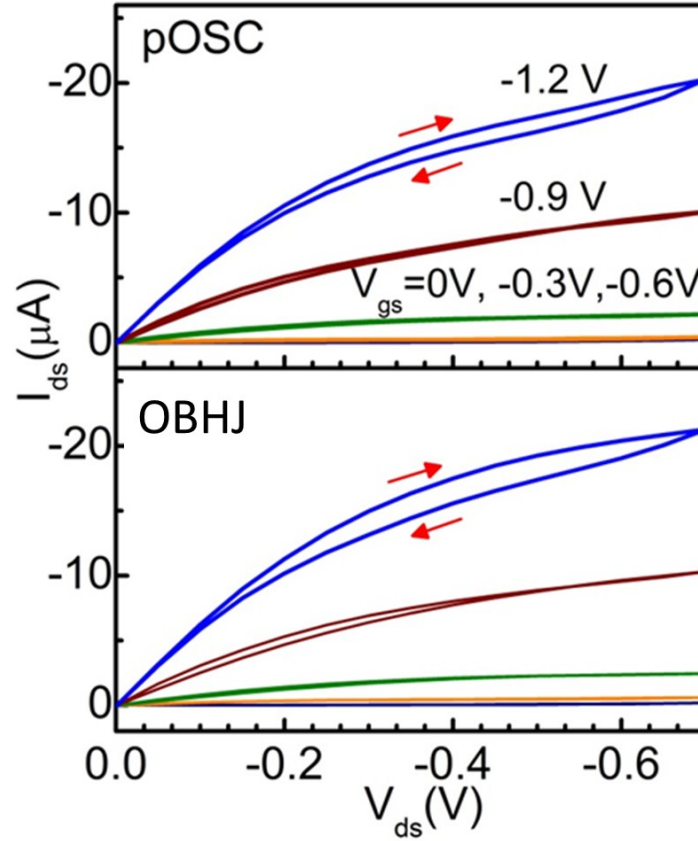

Fig. S2 Output characteristics of the aqEGOT and aqEGHT devices

## 5. Charge modulation spectroscopy (CMS):

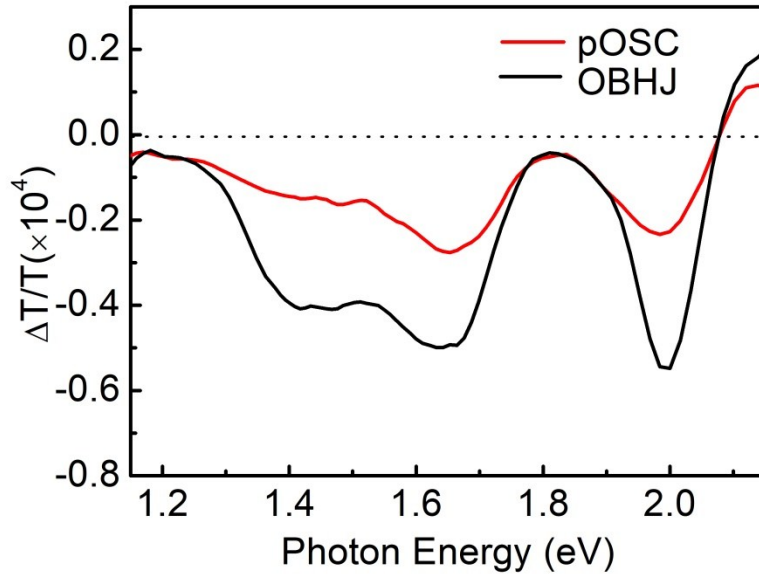

Fig S3. CMS spectra of pOSC and OBHJ FETs in the hole accumulation region ( $V_{gs}$  is set to -50V).

## 6. The aqEGOT sample based on pure P3HT with annealing temperature of 90 °C

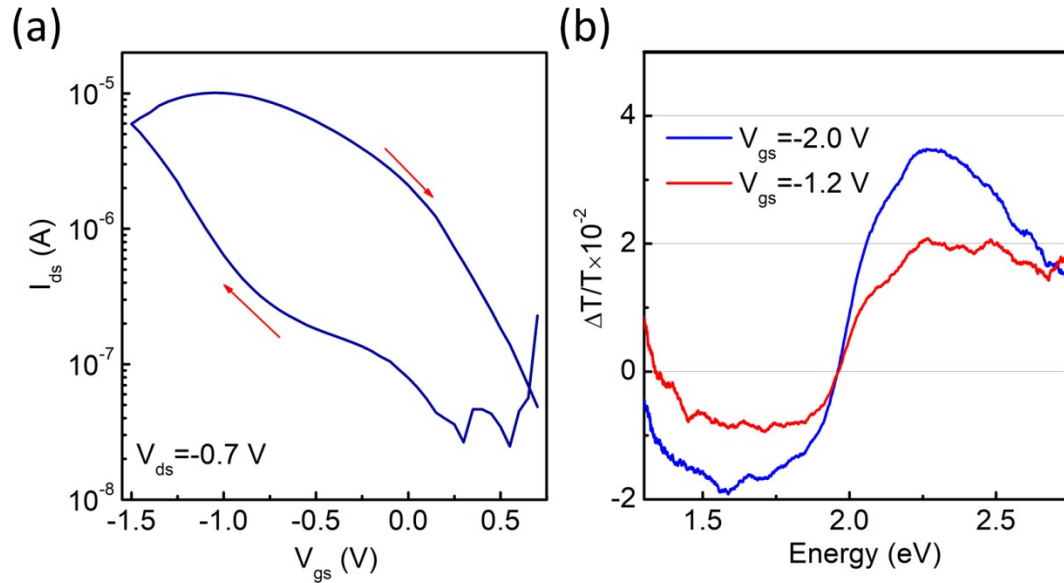

Fig S4. (a) Transfer characteristics and (b) CMS spectra of the aqEGOT based on pure P3HT with annealing temperature of 90 °C.
